# Supplementary material
Source: bioRxiv or medRxiv preprint supplement (http://biorxiv.org/highwire/filestream/133573/field_highwire_adjunct_files/6/319723-4.pdf)
Supplement: Supplementary file [file 319723-4.pdf]

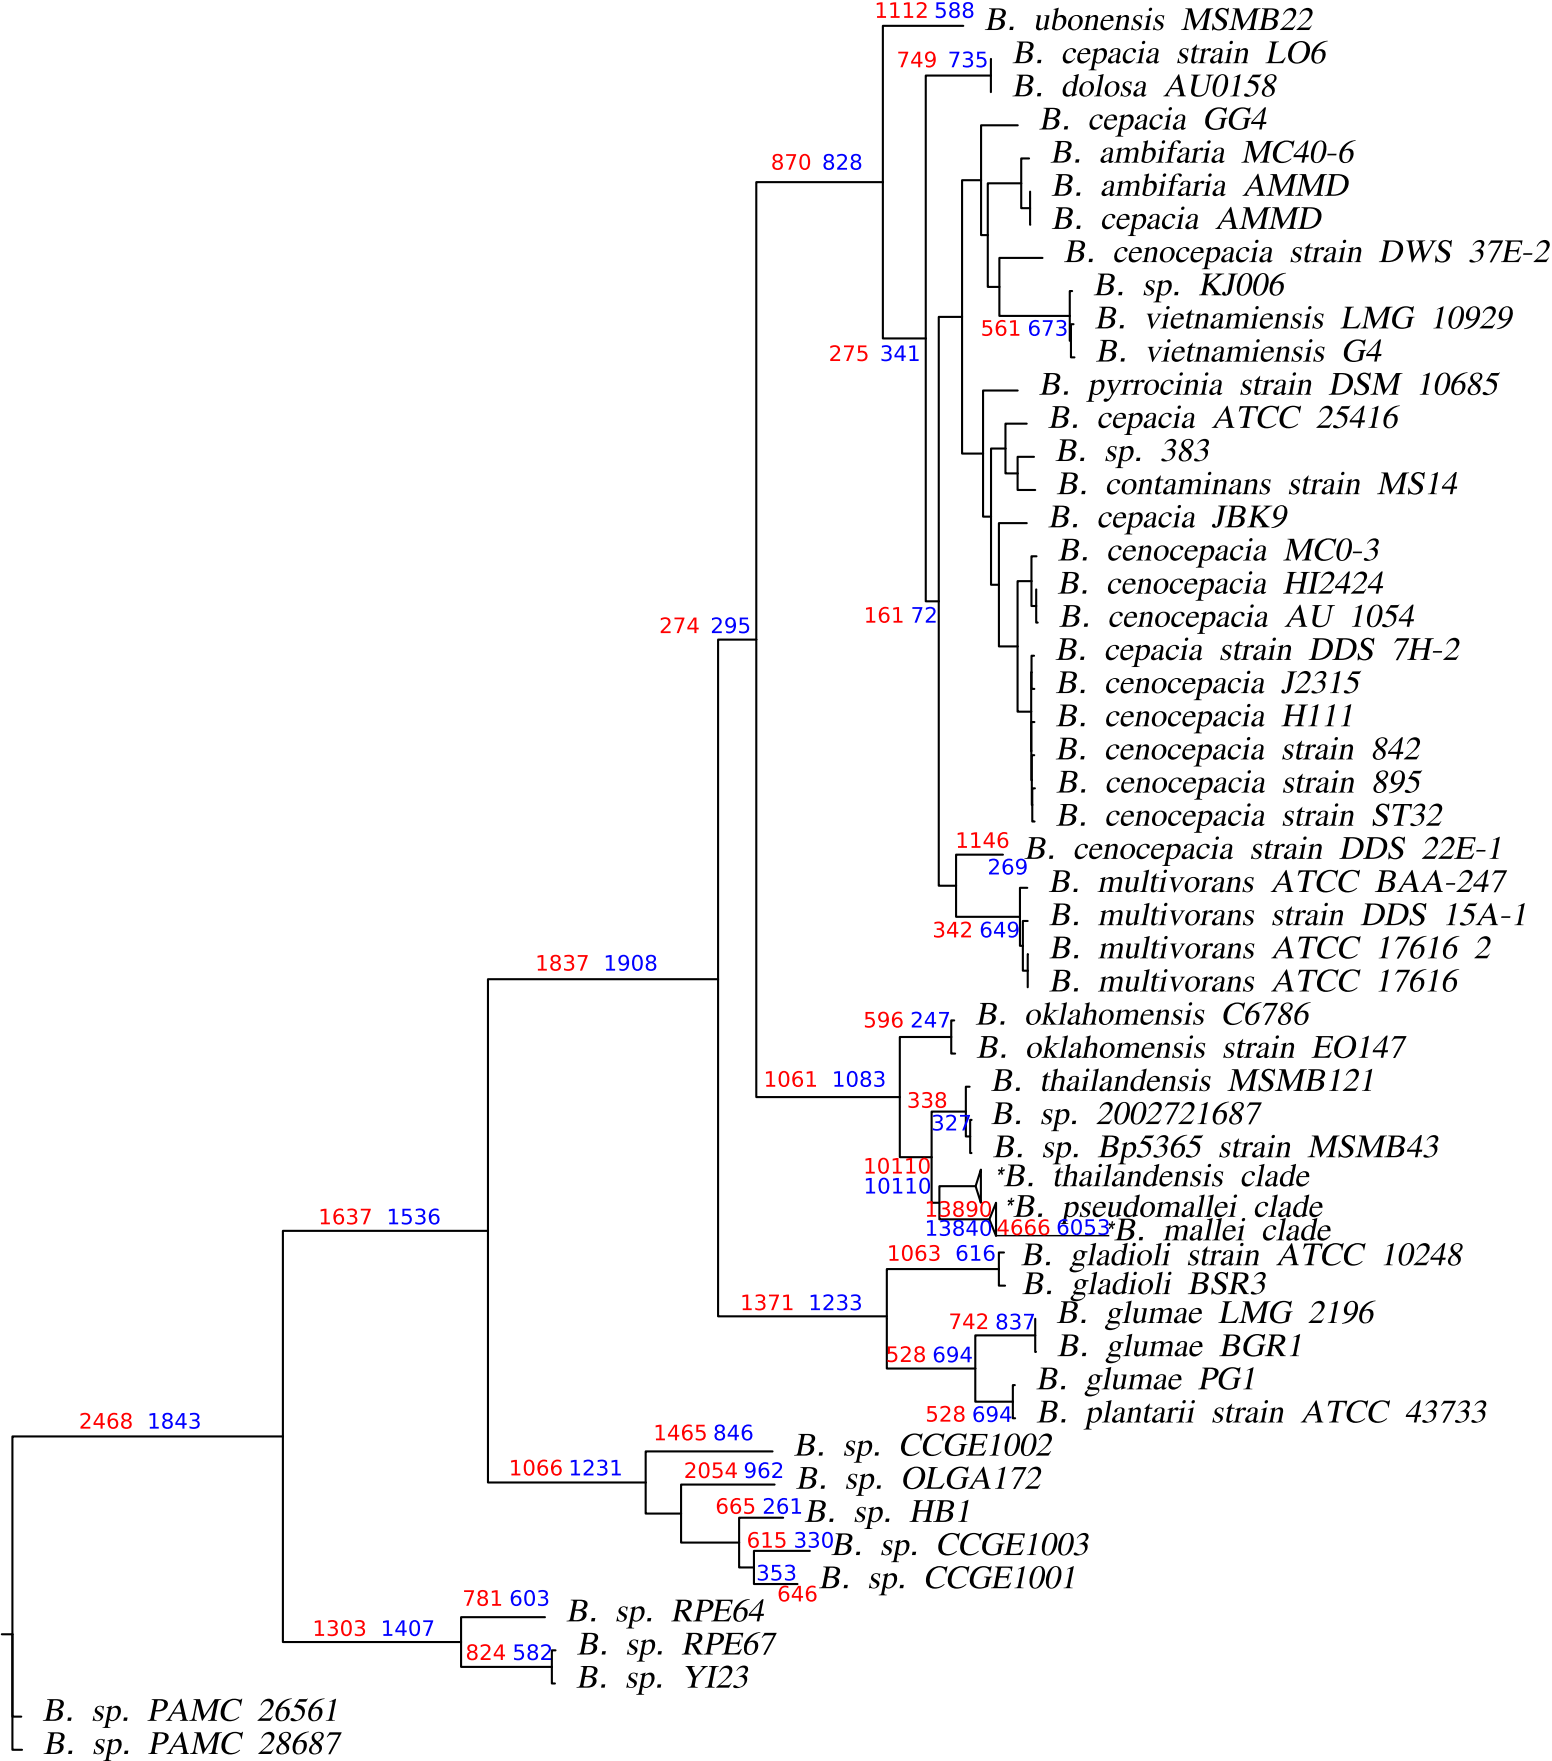

0.06
